# Supplementary material for: Evaluation Of Femoral, Acetabular and Global Offset Restoration Following Hip Spacer Implantation in Staged Total Hip Arthroplasty
Source: Research Square preprint supplement (doi:10.21203/rs.3.rs-8182860/v1), 2025-12-08
Supplement: Supplementary file 1 [file 3dde5d3e0b35b12ba17a9e1c.docx]

Table 7. Comparison between Dislocators and Non-Dislocators

| **Variable** | | **Non dislocators** | **Dislocators** | **p-value** |
| --- | --- | --- | --- | --- |
| Massive Acetabular defects (n°) | | 13 | 1 | 1.0 |
| Massive Femoral defects (n°) | | 13 | 0 | 0.56 |
| Spacer Head size | 48 | 36 | 3 | 0.53 |
| 52 | 3 | 1 | 0.30 |
| 56 | 4 | 0 | 1.0 |
| Spacer length | 140 | 16 | 1 | 1.0 |
| 170 | 1 | 0 | 1.0 |
|  | 210 | 26 | 3 | 1.0 |
| Abductor mechanism disruption (n°) | | 5 | 1 | 0.43 |
| Δ AO (mean+SD) | | + 0.9 ± 7.0 | - 1.8 ± 8.0 | 0.40 |
| Δ FO (mean+SD) | | + 2.0 ± 8.8 | - 17.5 ± 6.6 | **0.02** |
| Δ GO (mean+SD) | | + 0.3 ± 9.7 | - 19.3 ± 6.0 | **0.04** |
| Δ LLD (mean+SD) | | − 9.6 ± 3.7 | − 10.4 ± 1.2 | 0.34 |
