# Supplementary material for: Evaluation Of Femoral, Acetabular and Global Offset Restoration Following Hip Spacer Implantation in Staged Total Hip Arthroplasty
Source: Research Square preprint supplement (doi:10.21203/rs.3.rs-8182860/v1), 2025-12-08
Supplement: Supplementary file 2 [file 74fea30e4579c89c53b981f5.docx]

Table 2. Microbiological data

MSSA: *Methicillin Sensitive Staphylococcus Aureus*; MRSA: *Methicillin Resistant Staphylococcus Aureus;* MRSE: *Methicillin Resistant Staphylococcus Epidermidis;* CoNS: *Coagulase Negative Staphylococci;* MSSE: *Methicillin Sensitive Staphylococcus Epidermidis.*

| **Pathogen Type** | **N (%)** |
| --- | --- |
| Polymicrobial | 9 (19.1%) |
| MSSA | 8 (17.0%) |
| MRSA | 7 (14.9%) |
| MRSE | 5 (10.6%) |
| CoNS | 4 (8.5%) |
| Gram-negative bacteria | 4 (8.5%) |
| MSSE | 3 (6.4%) |
| Enterococci | 3 (6.4%) |
| Culture negative | 4 (8.5%) |
