# Supplementary material for: Evaluation Of Femoral, Acetabular and Global Offset Restoration Following Hip Spacer Implantation in Staged Total Hip Arthroplasty
Source: Research Square preprint supplement (doi:10.21203/rs.3.rs-8182860/v1), 2025-12-08
Supplement: Supplementary file 3 [file 77fe2b2ada2952640a577755.docx]

Table 1. Demographic features.

BMI: Body Mass Index; PJI: Periprosthetic Joint Infection

| **Variable** | **Value** |
| --- | --- |
| Sex |  |
| Male | 30 (63.8%) |
| Female | 17 (36.2%) |
| Mean age at explantation (years) | 63.1 ± 11.4 |
| Side |  |
| Left (L) | 18 (38.3%) |
| Right (R) | 29 (61.7%) |
| BMI (kg/m²) | 26.2 ± 5.3 |
| Number of previous surgeries | 2.3 ± 1.8 |
| Diagnosis: PJI | 47 (100%) |
| McPherson classification |  |
| IIIA1 | 5 (10.6%) |
| IIIA2 | 10 (21.3%) |
| IIIA3 | 20 (42.6%) |
| IIIB1 | — |
| IIIB2 | 2 (4.3%) |
| IIIB3 | 5 (10.6%) |
| IIIC1 | — |
| IIIC2 | — |
| IIIC3 | 5 (10.6%) |
