# Supplementary material for: Evaluation Of Femoral, Acetabular and Global Offset Restoration Following Hip Spacer Implantation in Staged Total Hip Arthroplasty
Source: Research Square preprint supplement (doi:10.21203/rs.3.rs-8182860/v1), 2025-12-08
Supplement: Supplementary file 4 [file 86cd6fd2e4d6144e3ef0a80a.docx]

Table 3. Main Surgical Data

| **Variable** | **Category** | **N (%)** |
| --- | --- | --- |
| **Acetabular defect (Paprosky)** | Type 1 | 20 (42.6%) |
|  | Type 2A | 5 (10.6%) |
|  | Type 2B | 3 (6.4%) |
|  | Type 2C | 5 (10.6%) |
|  | Type 3A | 8 (17.0%) |
|  | Type 3B | 6 (12.8%) |
| **Femoral defect (Paprosky)** | Type 1 | 18 (38.3%) |
|  | Type 2 | 15 (31.9%) |
|  | Type 3A | 8 (17.0%) |
|  | Type 3B | 6 (12.8%) |
| **Acetabular spacer** | Yes | 47/47 (100%) |
|  | No | 0/47 (0%) |
| **Mean interstage duration** | — | 16.6 ± 11.1 weeks |
| **Lateral window** | Yes | 12 (25.5%) |
|  | No | 35 (74.5%) |
| **Re-revision** | Yes | 8 (17.0%) |
|  | No | 39 (83.0%) |
