# Supplementary material for: Evaluation Of Femoral, Acetabular and Global Offset Restoration Following Hip Spacer Implantation in Staged Total Hip Arthroplasty
Source: Research Square preprint supplement (doi:10.21203/rs.3.rs-8182860/v1), 2025-12-08
Supplement: Supplementary file 5 [file 9d854e0a4c8ddbed697942e0.docx]

Table 4. Spacer Characteristics

| **Spacer Parameter** | **Size** | **N (%)** |
| --- | --- | --- |
| Hip spacer size | 10 | 26 (55.3%) |
|  | 13 | 19 (40.4%) |
|  | 15 | 2 (4.3%) |
| Spacer head diameter | 48 | 39 (83.0%) |
|  | 52 | 4 (8.5%) |
|  | 56 | 4 (8.5%) |
| Spacer stem length | 140 | 17 (36.2%) |
|  | 170 | 1 (2.1%) |
|  | 210 | 29 (61.7%) |
