# Supplementary material for: Evaluation Of Femoral, Acetabular and Global Offset Restoration Following Hip Spacer Implantation in Staged Total Hip Arthroplasty
Source: Research Square preprint supplement (doi:10.21203/rs.3.rs-8182860/v1), 2025-12-08
Supplement: Supplementary file 6 [file b67cc8de549a27bcb4e538a5.docx]

Table 5. Offset Data Comparison Between Spacer and Controlateral Hip

SD: Standard Deviation

| **Offset Parameter** | **Spacer (Mean ± SD)** | **Contralateral Hip (Mean ± SD)** | **Δ (Difference)** | **p-value** |
| --- | --- | --- | --- | --- |
| **Femoral Offset (mm)** | 48.4 ± 8.6 | 48.0 ± 9.9 | +0.4 ± 9.9 | 0.93 |
| **Acetabular Offset (mm)** | 35.1 ± 6.0 | 37.8 ± 6.2 | −2.7 ± 6.0 | 0.39 |
| **Global Offset (mm)** | 85.5 ± 9.6 | 87.8 ± 12.5 | −2.3 ± 7.7 | 0.45 |
