# Supplementary material for: Evaluation Of Femoral, Acetabular and Global Offset Restoration Following Hip Spacer Implantation in Staged Total Hip Arthroplasty
Source: Research Square preprint supplement (doi:10.21203/rs.3.rs-8182860/v1), 2025-12-08
Supplement: Supplementary file 7 [file c19f7305a75bf3fb05657054.docx]

Table 6. Interstage Complications

| **Complication Type** | **N** | **%** |
| --- | --- | --- |
| Dislocation | 4 | 8.5% |
| Peri-spacer fracture | 2 | 4.3% |
| Spacer fracture | 0 | 0.0% |
| Infection recurrence | 0 | 0.0% |
